# Supplementary material
Source: Research Square preprint supplement (doi:10.21203/rs.3.rs-9022552/v1)
Supplement: Supplementary file 1 [file f671f66ce6e59a3cb381d1c5.docx]

Table 1. Population and Imaging characteristics of breast cancer patients

| Variables | Total (n = 329) | 0 (n = 228) | 1 (n = 101) | Statistic | *P* |
| --- | --- | --- | --- | --- | --- |
|
| 3D axial SWE Emax, Mean ± SD | 127.81 ± 45.69 | 119.35 ± 47.27 | 146.90 ± 35.26 | t=-5.86 | **<.001** |
| 3D axial SWE Esd, Mean ± SD | 24.49 ± 13.85 | 23.49 ± 14.11 | 26.73 ± 13.05 | t=-1.96 | 0.050 |
| 3D axial SWE Eratio, Mean ± SD | 15.17 ± 12.84 | 14.14 ± 13.09 | 17.50 ± 12.02 | t=-2.20 | **0.029** |
| 3D sagittal SWE Emax, Mean ± SD | 133.41 ± 65.24 | 125.50 ± 72.11 | 151.28 ± 41.11 | t=-3.36 | **<.001** |
| 3D sagittal SWE Esd, Mean ± SD | 22.50 ± 12.57 | 21.57 ± 12.79 | 24.61 ± 11.85 | t=-2.03 | **0.043** |
| 3D sagittal SWE Eratio, Mean ± SD | 14.99 ± 9.17 | 13.21 ± 7.91 | 19.00 ± 10.49 | t=-5.53 | **<.001** |
| 3D coronal SWE Emax, Mean ± SD | 131.09 ± 46.19 | 120.74 ± 46.68 | 154.38 ± 35.52 | t=-7.16 | **<.001** |
| 3D coronal SWE Esd, Mean ± SD | 23.30 ± 11.78 | 21.74 ± 11.08 | 26.80 ± 12.57 | t=-3.66 | **<.001** |
| 3D coronal SWE Eratio, Mean ± SD | 17.35 ± 11.97 | 15.99 ± 11.97 | 20.40 ± 11.44 | t=-3.12 | **0.002** |
| Age, n(%) |  |  |  | χ²=0.10 | 0.757 |
| ＜40 | 27 (8.21) | 18 (7.89) | 9 (8.91) |  |  |
| ≥40 | 302 (91.79) | 210 (92.11) | 92 (91.09) |  |  |
| Lesion size, n(%) |  |  |  | χ²=17.68 | **<.001** |
| ＜15 | 94 (28.57) | 81 (35.53) | 13 (12.87) |  |  |
| ≥30 | 46 (13.98) | 28 (12.28) | 18 (17.82) |  |  |
| 15-30 | 189 (57.45) | 119 (52.19) | 70 (69.31) |  |  |
| Adler blood flow grade, n(%) |  |  |  | χ²=3.17 | 0.075 |
| 0-Ⅰ | 50 (15.20) | 40 (17.54) | 10 (9.90) |  |  |
| Ⅱ-Ⅲ | 279 (84.80) | 188 (82.46) | 91 (90.10) |  |  |
| B1-RADS-ultrasonography, n(%) |  |  |  | - | **0.007** |
| ≤3 | 5 (1.52) | 4 (1.75) | 1 (0.99) |  |  |
| ≤4 | 296 (89.97) | 212 (92.98) | 84 (83.17) |  |  |
| ≤5 | 28 (8.51) | 12 (5.26) | 16 (15.84) |  |  |
| BI-RADS-mammography, n(%) |  |  |  | χ²=6.58 | 0.160 |
| ＜4A | 29 (17.37) | 25 (19.84) | 4 (9.76) |  |  |
| 4A-4B | 30 (17.96) | 25 (19.84) | 5 (12.20) |  |  |
| 4B-4C | 34 (20.36) | 27 (21.43) | 7 (17.07) |  |  |
| 4C-4D | 58 (34.73) | 38 (30.16) | 20 (48.78) |  |  |
| ≥5 | 16 (9.58) | 11 (8.73) | 5 (12.20) |  |  |
| Aspect ratio, n(%) |  |  |  | χ²=2.38 | 0.123 |
| ＜1 | 123 (37.39) | 79 (34.65) | 44 (43.56) |  |  |
| ≥1 | 206 (62.61) | 149 (65.35) | 57 (56.44) |  |  |
| Stiff rim sign, n(%) |  |  |  | χ²=7.63 | **0.006** |
| No | 58 (17.63) | 49 (21.49) | 9 (8.91) |  |  |
| Yes | 271 (82.37) | 179 (78.51) | 92 (91.09) |  |  |
| Convergence sign, n(%) |  |  |  | χ²=2.02 | 0.156 |
| No | 133 (40.43) | 98 (42.98) | 35 (34.65) |  |  |
| Yes | 196 (59.57) | 130 (57.02) | 66 (65.35) |  |  |
| TNM stage, n(%) |  |  |  | χ²=13.56 | **0.001** |
| T1 | 144 (43.77) | 115 (50.44) | 29 (28.71) |  |  |
| T2 | 176 (53.50) | 108 (47.37) | 68 (67.33) |  |  |
| T3 | 9 (2.74) | 5 (2.19) | 4 (3.96) |  |  |
| Molecular subtype, n(%) |  |  |  | χ²=5.50 | 0.240 |
| Triple negative | 31 (9.87) | 22 (10.19) | 9 (9.18) |  |  |
| HER2-enriched (HR positive) | 39 (12.42) | 24 (11.11) | 15 (15.31) |  |  |
| HER2-enriched (HRnegative) | 35 (11.15) | 26 (12.04) | 9 (9.18) |  |  |
| LuminalA | 124 (39.49) | 92 (42.59) | 32 (32.65) |  |  |
| LuminalB | 85 (27.07) | 52 (24.07) | 33 (33.67) |  |  |
| Diagnosis by tissue structural grades, n(%) |  |  |  | χ²=3.69 | 0.055 |
| ＜2 | 117 (35.67) | 89 (39.04) | 28 (28.00) |  |  |
| ≥2 | 211 (64.33) | 139 (60.96) | 72 (72.00) |  |  |
| Menstruation, n(%) |  |  |  | χ²=0.86 | 0.354 |
| No | 214 (65.05) | 152 (66.67) | 62 (61.39) |  |  |
| Yes | 115 (34.95) | 76 (33.33) | 39 (38.61) |  |  |
| Previous pregnancy history, n(%) |  |  |  | χ²=1.19 | 0.274 |
| No | 10 (3.04) | 9 (3.95) | 1 (0.99) |  |  |
| Yes | 319 (96.96) | 219 (96.05) | 100 (99.01) |  |  |
| History of pregnancy, n(%) |  |  |  | χ²=0.00 | 1.000 |
| No | 14 (4.26) | 10 (4.39) | 4 (3.96) |  |  |
| Yes | 315 (95.74) | 218 (95.61) | 97 (96.04) |  |  |
| Family history of breast cancer, n(%) |  |  |  | χ²=0.03 | 0.863 |
| No | 285 (86.63) | 198 (86.84) | 87 (86.14) |  |  |
| Yes | 44 (13.37) | 30 (13.16) | 14 (13.86) |  |  |
| Lesion visibility, n(%) |  |  |  | χ²=17.25 | **<.001** |
| No | 60 (18.24) | 55 (24.12) | 5 (4.95) |  |  |
| Yes | 269 (81.76) | 173 (75.88) | 96 (95.05) |  |  |
| Location, n(%) |  |  |  | χ²=0.02 | 0.889 |
| Left | 174 (52.89) | 120 (52.63) | 54 (53.47) |  |  |
| Right | 155 (47.11) | 108 (47.37) | 47 (46.53) |  |  |
| Margin, n(%) |  |  |  | χ²=0.00 | 1.000 |
| Smooth | 4 (1.22) | 3 (1.32) | 1 (0.99) |  |  |
| Irregular | 325 (98.78) | 225 (98.68) | 100 (99.01) |  |  |
| Rear echo characteristics, n(%) |  |  |  | χ²=0.14 | 0.704 |
| No | 290 (88.15) | 202 (88.60) | 88 (87.13) |  |  |
| Yes | 39 (11.85) | 26 (11.40) | 13 (12.87) |  |  |
| Calcifications, n(%) |  |  |  | χ²=28.93 | **<.001** |
| No | 100 (30.40) | 90 (39.47) | 10 (9.90) |  |  |
| Yes | 229 (69.60) | 138 (60.53) | 91 (90.10) |  |  |
| ER, n(%) |  |  |  | χ²=0.54 | 0.460 |
| Negative | 53 (16.11) | 39 (17.11) | 14 (13.86) |  |  |
| Positive | 276 (83.89) | 189 (82.89) | 87 (86.14) |  |  |
| PR, n(%) |  |  |  | χ²=0.39 | 0.532 |
| Negative | 89 (27.05) | 64 (28.07) | 25 (24.75) |  |  |
| Positive | 240 (72.95) | 164 (71.93) | 76 (75.25) |  |  |
| HER2, n(%) |  |  |  | χ²=20.72 | **<.001** |
| Negative | 163 (49.54) | 132 (57.89) | 31 (30.69) |  |  |
| Positive | 166 (50.46) | 96 (42.11) | 70 (69.31) |  |  |
| Ki67, n(%) |  |  |  | χ²=82.91 | **<.001** |
| Negative | 162 (49.54) | 150 (66.37) | 12 (11.88) |  |  |
| Positive | 165 (50.46) | 76 (33.63) | 89 (88.12) |  |  |
| t: t-test, χ²: Chi-square test, -: Fisher exact |
| SD: standard deviation |

Table 2. Demographic and imaging features of patients in the training and validation cohorts

| Variables | Total (n = 329) | Training (n=230) | Validation (n=99) | Statistic | *P* |
| --- | --- | --- | --- | --- | --- |
|
| 3D axial SWE Emax, Mean ± SD | 127.81 ± 45.69 | 132.49 ± 43.51 | 125.79 ± 46.54 | t=1.22 | 0.223 |
| 3D axial SWE Esd, Mean ± SD | 24.49 ± 13.85 | 24.28 ± 13.20 | 24.58 ± 14.15 | t=-0.18 | 0.859 |
| 3D axial SWE Eratio, Mean ± SD | 15.17 ± 12.84 | 15.71 ± 11.99 | 14.94 ± 13.21 | t=0.50 | 0.619 |
| 3D sagittal SWE Emax, Mean ± SD | 133.41 ± 65.24 | 138.59 ± 91.48 | 131.18 ± 49.98 | t=0.94 | 0.345 |
| 3D sagittal SWE Esd, Mean ± SD | 22.50 ± 12.57 | 24.68 ± 16.41 | 21.57 ± 10.39 | t=1.74 | 0.084 |
| 3D sagittal SWE Eratio, Mean ± SD | 14.99 ± 9.17 | 16.38 ± 10.12 | 14.38 ± 8.68 | t=1.82 | 0.070 |
| 3D coronal SWE Emax, Mean ± SD | 131.09 ± 46.19 | 132.45 ± 42.51 | 130.51 ± 47.78 | t=0.35 | 0.728 |
| 3D coronal SWE Esd, Mean ± SD | 23.30 ± 11.78 | 24.31 ± 12.30 | 22.86 ± 11.55 | t=1.03 | 0.305 |
| 3D coronal SWE Eratio, Mean ± SD | 17.35 ± 11.97 | 17.76 ± 13.30 | 17.17 ± 11.37 | t=0.41 | 0.685 |
| Age, n(%) |  |  |  | χ²=0.15 | 0.701 |
| ＜40 | 27 (8.21) | 9 (9.09) | 18 (7.83) |  |  |
| ≥40 | 302 (91.79) | 90 (90.91) | 212 (92.17) |  |  |
| Lesion size, n(%) |  |  |  | χ²=2.67 | 0.263 |
| ＜15 | 94 (28.57) | 33 (33.33) | 61 (26.52) |  |  |
| ≥30 | 46 (13.98) | 10 (10.10) | 36 (15.65) |  |  |
| 15-30 | 189 (57.45) | 56 (56.57) | 133 (57.83) |  |  |
| Adler blood flow grade, n(%) |  |  |  | χ²=1.83 | 0.176 |
| 0-Ⅰ | 50 (15.20) | 11 (11.11) | 39 (16.96) |  |  |
| Ⅱ-Ⅲ | 279 (84.80) | 88 (88.89) | 191 (83.04) |  |  |
| B1-RADS (ultrasound), n(%) |  |  |  | - | 0.590 |
| ≤3 | 5 (1.52) | 1 (1.01) | 4 (1.74) |  |  |
| ≤4 | 296 (89.97) | 92 (92.93) | 204 (88.70) |  |  |
| ≤5 | 28 (8.51) | 6 (6.06) | 22 (9.57) |  |  |
| BI-RADS-mammography, n(%) |  |  |  | χ²=2.97 | 0.563 |
| ＜4A | 29 (17.37) | 10 (21.74) | 19 (15.70) |  |  |
| 4A-4B | 30 (17.96) | 6 (13.04) | 24 (19.83) |  |  |
| 4B-4C | 34 (20.36) | 12 (26.09) | 22 (18.18) |  |  |
| 4C-4D | 58 (34.73) | 14 (30.43) | 44 (36.36) |  |  |
| ≥5 | 16 (9.58) | 4 (8.70) | 12 (9.92) |  |  |
| Aspect ratio, n(%) |  |  |  | χ²=3.01 | 0.083 |
| ＜1 | 123 (37.39) | 44 (44.44) | 79 (34.35) |  |  |
| ≥1 | 206 (62.61) | 55 (55.56) | 151 (65.65) |  |  |
| Stiff rim sign, n(%) |  |  |  | χ²=1.97 | 0.160 |
| No | 58 (17.63) | 13 (13.13) | 45 (19.57) |  |  |
| Yes | 271 (82.37) | 86 (86.87) | 185 (80.43) |  |  |
| Convergence sign, n(%) |  |  |  | χ²=0.25 | 0.621 |
| No | 133 (40.43) | 38 (38.38) | 95 (41.30) |  |  |
| Yes | 196 (59.57) | 61 (61.62) | 135 (58.70) |  |  |
| TNM stage, n(%) |  |  |  | χ²=0.60 | 0.739 |
| T1 | 144 (43.77) | 46 (46.46) | 98 (42.61) |  |  |
| T2 | 176 (53.50) | 51 (51.52) | 125 (54.35) |  |  |
| T3 | 9 (2.74) | 2 (2.02) | 7 (3.04) |  |  |
| Molecular subtype, n(%) |  |  |  | χ²=0.10 | 0.999 |
| Triple negative | 31 (9.87) | 9 (9.68) | 22 (9.95) |  |  |
| HER2-enriched (HR positive) | 39 (12.42) | 11 (11.83) | 28 (12.67) |  |  |
| HER2-enriched (HRnegative) | 35 (11.15) | 11 (11.83) | 24 (10.86) |  |  |
| LuminalA | 124 (39.49) | 37 (39.78) | 87 (39.37) |  |  |
| LuminalB | 85 (27.07) | 25 (26.88) | 60 (27.15) |  |  |
| Diagnosis by tissue structural grades, n(%) |  |  |  | χ²=2.51 | 0.113 |
| ＜2 | 117 (35.67) | 29 (29.29) | 88 (38.43) |  |  |
| ≥2 | 211 (64.33) | 70 (70.71) | 141 (61.57) |  |  |
| Menstruation, n(%) |  |  |  | χ²=0.73 | 0.392 |
| No | 214 (65.05) | 61 (61.62) | 153 (66.52) |  |  |
| Yes | 115 (34.95) | 38 (38.38) | 77 (33.48) |  |  |
| Previous pregnancy history, n(%) |  |  |  | χ²=0.13 | 0.721 |
| No | 10 (3.04) | 2 (2.02) | 8 (3.48) |  |  |
| Yes | 319 (96.96) | 97 (97.98) | 222 (96.52) |  |  |
| History of pregnancy, n(%) |  |  |  | χ²=0.18 | 0.671 |
| No | 14 (4.26) | 3 (3.03) | 11 (4.78) |  |  |
| Yes | 315 (95.74) | 96 (96.97) | 219 (95.22) |  |  |
| Family history of breast cancer, n(%) |  |  |  | χ²=1.76 | 0.184 |
| No | 285 (86.63) | 82 (82.83) | 203 (88.26) |  |  |
| Yes | 44 (13.37) | 17 (17.17) | 27 (11.74) |  |  |
| Detectability, n(%) |  |  |  | χ²=0.09 | 0.769 |
| No | 60 (18.24) | 19 (19.19) | 41 (17.83) |  |  |
| Yes | 269 (81.76) | 80 (80.81) | 189 (82.17) |  |  |
| Location, n(%) |  |  |  | χ²=0.16 | 0.693 |
| Left | 174 (52.89) | 54 (54.55) | 120 (52.17) |  |  |
| Right | 155 (47.11) | 45 (45.45) | 110 (47.83) |  |  |
| Margin, n(%) |  |  |  | χ²=0.00 | 1.000 |
| Smooth | 4 (1.22) | 1 (1.01) | 3 (1.30) |  |  |
| Irregular | 325 (98.78) | 98 (98.99) | 227 (98.70) |  |  |
| Rear echo characteristics, n(%) |  |  |  | χ²=1.47 | 0.225 |
| No | 290 (88.15) | 84 (84.85) | 206 (89.57) |  |  |
| Yes | 39 (11.85) | 15 (15.15) | 24 (10.43) |  |  |
| Calcifications, n(%) |  |  |  | χ²=0.08 | 0.776 |
| No | 100 (30.40) | 29 (29.29) | 71 (30.87) |  |  |
| Yes | 229 (69.60) | 70 (70.71) | 159 (69.13) |  |  |
| ER, n(%) |  |  |  | χ²=0.10 | 0.756 |
| Negative | 53 (16.11) | 15 (15.15) | 38 (16.52) |  |  |
| Positive | 276 (83.89) | 84 (84.85) | 192 (83.48) |  |  |
| PR, n(%) |  |  |  | χ²=1.30 | 0.254 |
| Negative | 89 (27.05) | 31 (31.31) | 58 (25.22) |  |  |
| Positive | 240 (72.95) | 68 (68.69) | 172 (74.78) |  |  |
| HER2, n(%) |  |  |  | χ²=1.42 | 0.234 |
| Negative | 163 (49.54) | 54 (54.55) | 109 (47.39) |  |  |
| Positive | 166 (50.46) | 45 (45.45) | 121 (52.61) |  |  |
| Ki67, n(%) |  |  |  | χ²=0.95 | 0.330 |
| Negative | 162 (49.54) | 45 (45.45) | 117 (51.32) |  |  |
| Positive | 165 (50.46) | 54 (54.55) | 111 (48.68) |  |  |
| t: t-test, χ²: Chi-square test, -: Fisher exact |
| SD: standard deviation |

Table 3. Univariable logistic regression analysis for predictors of ALNM in the training cohort

| Variables | β | S.E | Z | *P* | OR (95%CI) |
| --- | --- | --- | --- | --- | --- |
|
| Age |  |  |  |  |  |
| ＜40 |  |  |  |  |  |
| ≥40 | 0.14 | 0.55 | 0.26 | 0.799 | 1.15 (0.39 ~ 3.36) |
| Lesion size |  |  |  |  |  |
| ＜15 |  |  |  |  |  |
| ≥30 | 1.42 | 0.49 | 2.87 | **0.004** | 4.13 (1.57 ~ 10.88) |
| 15-30 | 1.12 | 0.40 | 2.76 | **0.006** | 3.05 (1.38 ~ 6.75) |
| Adler blood flow grade |  |  |  |  |  |
| 0-Ⅰ |  |  |  |  |  |
| Ⅱ-Ⅲ | 0.62 | 0.43 | 1.46 | 0.144 | 1.86 (0.81 ~ 4.29) |
| B1-RADS-ultrasonography |  |  |  |  |  |
| ≤3 |  |  |  |  |  |
| ≤4 | 0.15 | 1.17 | 0.13 | 0.897 | 1.16 (0.12 ~ 11.42) |
| ≤5 | 1.28 | 1.23 | 1.04 | 0.298 | 3.60 (0.32 ~ 40.23) |
| BI-RADS-mammography |  |  |  |  |  |
| ＜4A |  |  |  |  |  |
| 4A-4B | -0.27 | 0.88 | -0.31 | 0.758 | 0.76 (0.14 ~ 4.29) |
| 4B-4C | 0.69 | 0.79 | 0.88 | 0.381 | 2.00 (0.42 ~ 9.42) |
| 4C-4D | 1.01 | 0.70 | 1.44 | 0.150 | 2.76 (0.69 ~ 10.98) |
| ≥5 | 0.58 | 0.92 | 0.63 | 0.530 | 1.78 (0.29 ~ 10.72) |
| Aspect ratio |  |  |  |  |  |
| ＜1 |  |  |  |  |  |
| ≥1 | -0.53 | 0.30 | -1.79 | 0.074 | 0.59 (0.33 ~ 1.05) |
| Stiff rim sign |  |  |  |  |  |
| No |  |  |  |  |  |
| Yes | 1.03 | 0.44 | 2.34 | **0.019** | 2.80 (1.18 ~ 6.64) |
| Convergence sign |  |  |  |  |  |
| No |  |  |  |  |  |
| Yes | 0.51 | 0.30 | 1.71 | 0.087 | 1.67 (0.93 ~ 3.01) |
| TNM stage |  |  |  |  |  |
| T1 |  |  |  |  |  |
| T2 | 0.85 | 0.31 | 2.74 | **0.006** | 2.35 (1.28 ~ 4.33) |
| T3 | 1.07 | 0.80 | 1.34 | 0.182 | 2.92 (0.61 ~ 14.14) |
| Molecular subtype |  |  |  |  |  |
| Triple negative |  |  |  |  |  |
| HER2-enriched (HR positive) | 0.69 | 0.61 | 1.13 | 0.258 | 2.00 (0.60 ~ 6.64) |
| HER2-enriched (HRnegative) | -0.63 | 0.73 | -0.86 | 0.388 | 0.53 (0.13 ~ 2.22) |
| LuminalA | -0.04 | 0.54 | -0.08 | 0.937 | 0.96 (0.33 ~ 2.74) |
| LuminalB | 0.51 | 0.55 | 0.92 | 0.356 | 1.66 (0.57 ~ 4.85) |
| Diagnosis by tissue structural grades |  |  |  |  |  |
| ＜2 |  |  |  |  |  |
| ≥2 | 0.69 | 0.31 | 2.21 | **0.027** | 2.00 (1.08 ~ 3.69) |
| Menstruation, n(%) |  |  |  |  |  |
| No |  |  |  |  |  |
| Yes | 0.14 | 0.30 | 0.48 | 0.635 | 1.15 (0.64 ~ 2.08) |
| Previous pregnancy history, n(%) |  |  |  |  |  |
| No |  |  |  |  |  |
| Yes | 1.15 | 1.08 | 1.07 | 0.287 | 3.16 (0.38 ~ 26.16) |
| History of pregnancy, n(%) |  |  |  |  |  |
| No |  |  |  |  |  |
| Yes | 0.16 | 0.69 | 0.23 | 0.815 | 1.18 (0.30 ~ 4.57) |
| Family history of breast cancer, n(%) |  |  |  |  |  |
| No |  |  |  |  |  |
| Yes | -0.04 | 0.45 | -0.10 | 0.923 | 0.96 (0.40 ~ 2.30) |
| Lesion visibility, n(%) |  |  |  |  |  |
| No |  |  |  |  |  |
| Yes | 3.14 | 1.02 | 3.06 | **0.002** | 23.00 (3.09 ~ 171.02) |
| Location |  |  |  |  |  |
| Left |  |  |  |  |  |
| Right | -0.04 | 0.29 | -0.14 | 0.891 | 0.96 (0.55 ~ 1.69) |
| Margin |  |  |  |  |  |
| Smooth |  |  |  |  |  |
| Irregular | -0.14 | 1.23 | -0.11 | 0.913 | 0.87 (0.08 ~ 9.79) |
| Rear echo characteristics |  |  |  |  |  |
| No |  |  |  |  |  |
| Yes | 0.15 | 0.46 | 0.33 | 0.745 | 1.16 (0.47 ~ 2.85) |
| Calcifications |  |  |  |  |  |
| No |  |  |  |  |  |
| Yes | 2.21 | 0.49 | 4.50 | **<.001** | 9.13 (3.49 ~ 23.90) |
| ER |  |  |  |  |  |
| Negative |  |  |  |  |  |
| Positive | 0.58 | 0.43 | 1.36 | 0.173 | 1.79 (0.77 ~ 4.13) |
| PR |  |  |  |  |  |
| Negative |  |  |  |  |  |
| Positive | 0.30 | 0.34 | 0.87 | 0.382 | 1.35 (0.69 ~ 2.63) |
| HER2 |  |  |  |  |  |
| Negative |  |  |  |  |  |
| Positive | 1.05 | 0.31 | 3.43 | **<.001** | 2.85 (1.57 ~ 5.19) |
| Ki67 |  |  |  |  |  |
| Negative |  |  |  |  |  |
| Positive | 2.68 | 0.40 | 6.78 | **<.001** | 14.64 (6.74 ~ 31.81) |
| 3D axial SWE Emax | 0.01 | 0.00 | 3.89 | **<.001** | 1.01 (1.01 ~ 1.02) |
| 3D axial SWE Esd | 0.01 | 0.01 | 1.01 | 0.315 | 1.01 (0.99 ~ 1.03) |
| 3D axial SWE Eratio | 0.01 | 0.01 | 1.19 | 0.232 | 1.01 (0.99 ~ 1.03) |
| 3D sagittal SWE Emax | 0.01 | 0.00 | 3.66 | **<.001** | 1.01 (1.01 ~ 1.02) |
| 3D sagittal SWE Esd | 0.02 | 0.01 | 1.52 | 0.128 | 1.02 (0.99 ~ 1.05) |
| 3D sagittal SWE Eratio | 0.08 | 0.02 | 4.20 | **<.001** | 1.08 (1.04 ~ 1.12) |
| 3D coronal SWE Emax | 0.02 | 0.00 | 4.69 | **<.001** | 1.02 (1.01 ~ 1.03) |
| 3D coronal SWE Esd | 0.04 | 0.01 | 3.30 | **<.001** | 1.04 (1.02 ~ 1.07) |
| 3D coronal SWE Eratio | 0.05 | 0.01 | 3.73 | **<.001** | 1.05 (1.02 ~ 1.08) |
| OR: Odds Ratio, CI: Confidence Interval |

Table 4. Multivariate Logistic Analysis on the Training Dataset

| Variables | β | S.E | Z | *P* | OR (95%CI) |
| --- | --- | --- | --- | --- | --- |
|
| Intercept | -6.98 | 1.08 | -6.47 | **<.001** | 0.00 (0.00 ~ 0.01) |
| Calcifications |  |  |  |  |  |
| No |  |  |  |  |  |
| Yes | 2.04 | 0.55 | 3.70 | **<.001** | 7.66 (2.61 ~ 22.52) |
| HER2 |  |  |  |  |  |
| Negative |  |  |  |  |  |
| Positive | 1.08 | 0.40 | 2.68 | **0.007** | 2.94 (1.34 ~ 6.48) |
| Ki67 |  |  |  |  |  |
| Negative |  |  |  |  |  |
| Positive | 2.23 | 0.44 | 5.04 | **<.001** | 9.25 (3.90 ~ 21.98) |
| 3D sagittal SWE Eratio | 0.06 | 0.02 | 2.61 | **0.009** | 1.07 (1.02 ~ 1.12) |
| 3D coronal SWE Emax | 0.01 | 0.01 | 2.06 | **0.039** | 1.01 (1.01 ~ 1.02) |
| OR: Odds Ratio, CI: Confidence Interval |
